# Supplementary material for: A Sensor Array Using Multi-functional Field-effect Transistors with Ultrahigh Sensitivity and Precision for Bio-monitoring
Source: Springer Nature journal article supplement (doi:10.1038/srep12705), 2015-07-30
Supplement: 41598_2015_BFsrep12705_MOESM1_ESM.pdf [file 41598_2015_BFsrep12705_MOESM1_ESM.pdf]

## SUPPORTING INFORMATION PARAGRAPH

### **A Sensor Array Using Multi-functional Field-effect Transistors with Ultrahigh Sensitivity and Precision for Bio-monitoring**

*Do-Il Kim<sup>1</sup>, Tran Quang Trung<sup>1</sup>, Byeong-Ung Hwang<sup>1</sup>, Jin-Su Kim<sup>1</sup>, Sanghun Jeon<sup>3</sup>, Jihyun Bae<sup>4</sup>, Jong-Jin Park<sup>5</sup> & Nae-Eung Lee<sup>1,2\*</sup>,*

<sup>1</sup>School of Advanced Materials Science & Engineering, Sungkyunkwan University, Suwon, Kyunggi-do 440-746, Republic of Korea.

<sup>2</sup>SKKU Advanced Institute of Nano Technology (SAINT), Sungkyunkwan University, Suwon, Kyunggi-do 440-746, Republic of Korea

<sup>3</sup>Department of Applied Physics, Korea University, Sejongro 2511, Sejong 339-700, Korea

<sup>4</sup>Samsung Advanced Institute of Technology, Samsung Electronics Corporation, Yongin, Kyunggi-do 446-712, Republic of Korea

<sup>5</sup>School of Polymer Science & Engineering, Chonnam National University, Gwangju 500-757, Korea

*\*E-mail: nelee@skku.edu*

Supporting Figure S1:

The process flow for manufacturing a microstructured FET sensor

**1. Micro-pattern preparation**

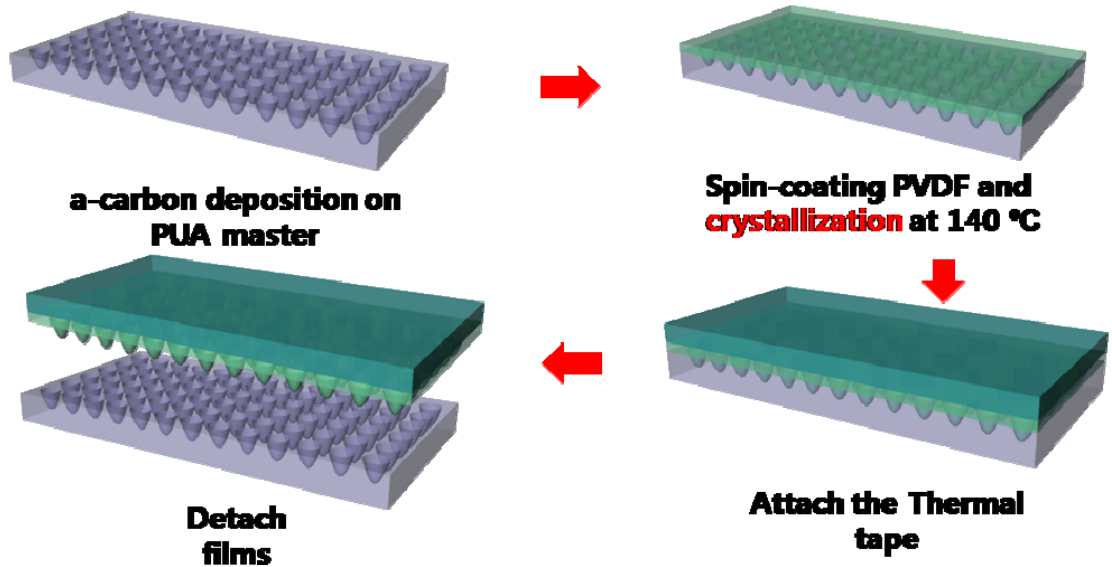

**2. FET Fabrication**

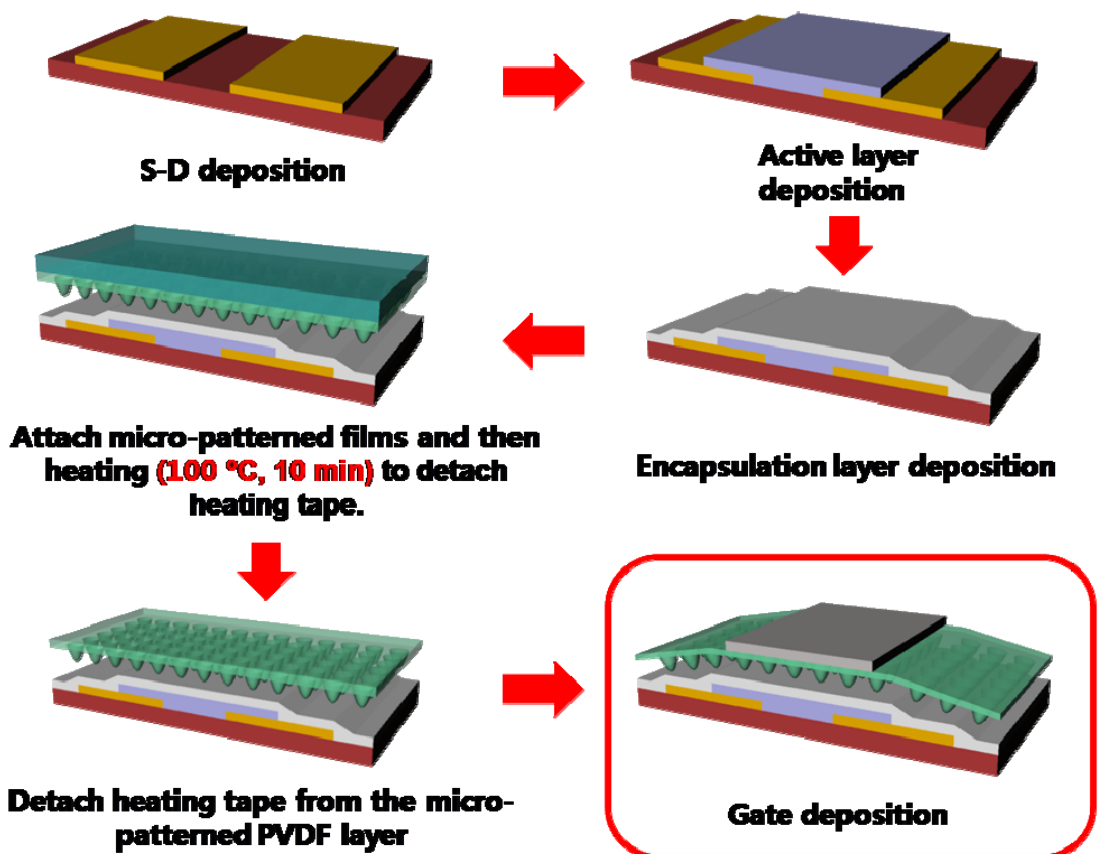

Supporting Figure S2:

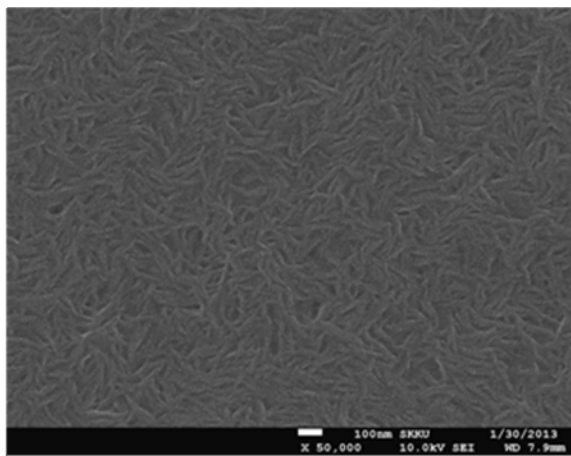

**2 hours**

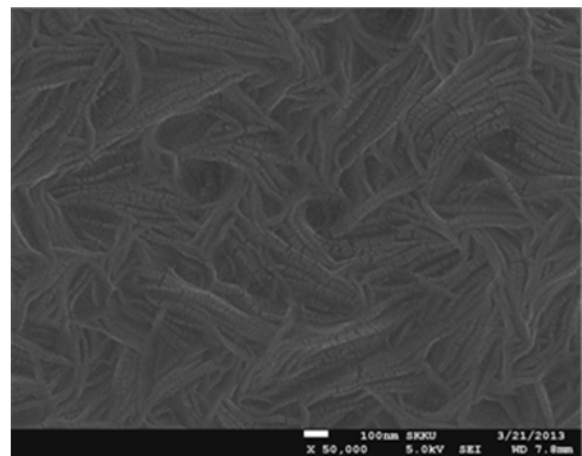

**4 hours**

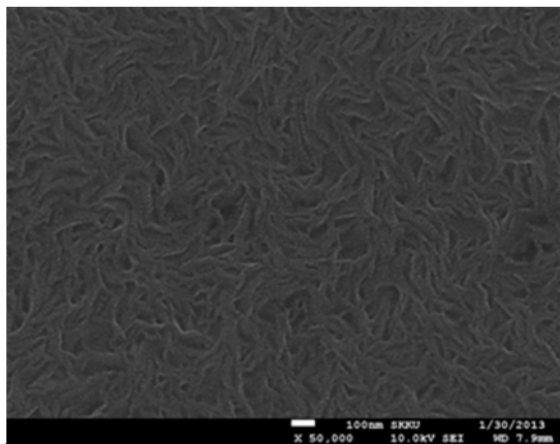

**6 hours**

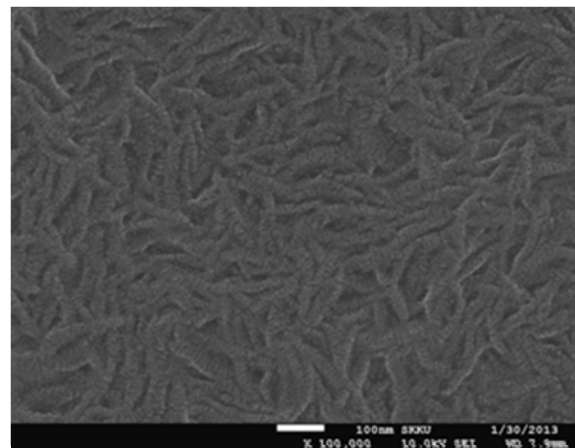

**8 hours**

FE-SEM images of thick P(VDF-TrFE) microstructures formed at 140 °C with varying annealing time.

Supporting Figure S3:

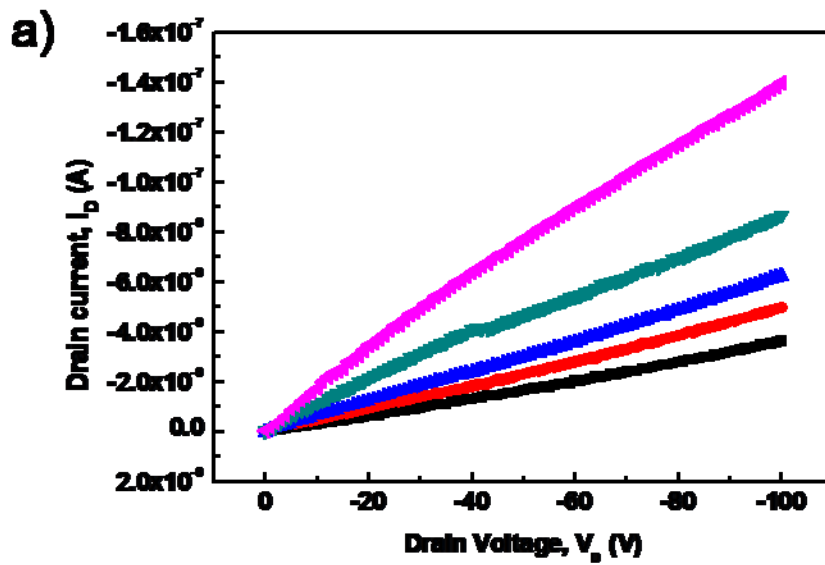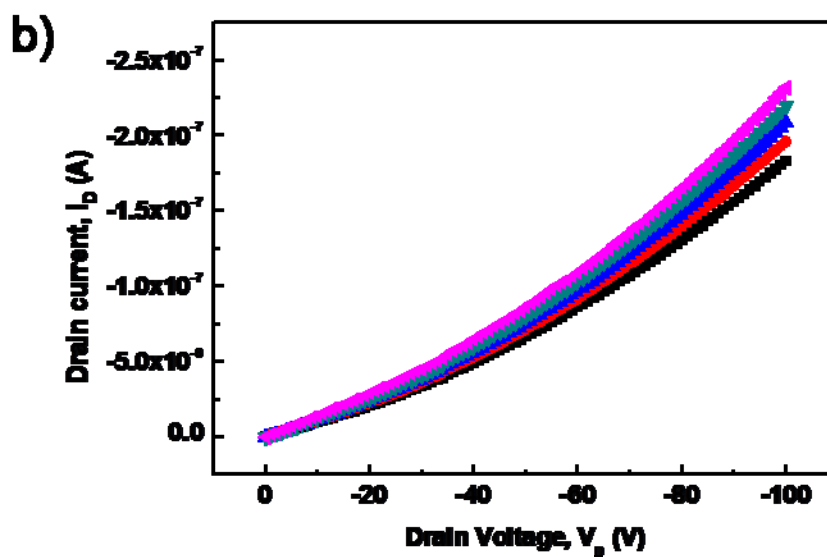

Output characteristics of a microstructured FET sensor (a) before poling and (b) after poling by being biased  $V_G$  of -100 V

Supporting Figure S4:

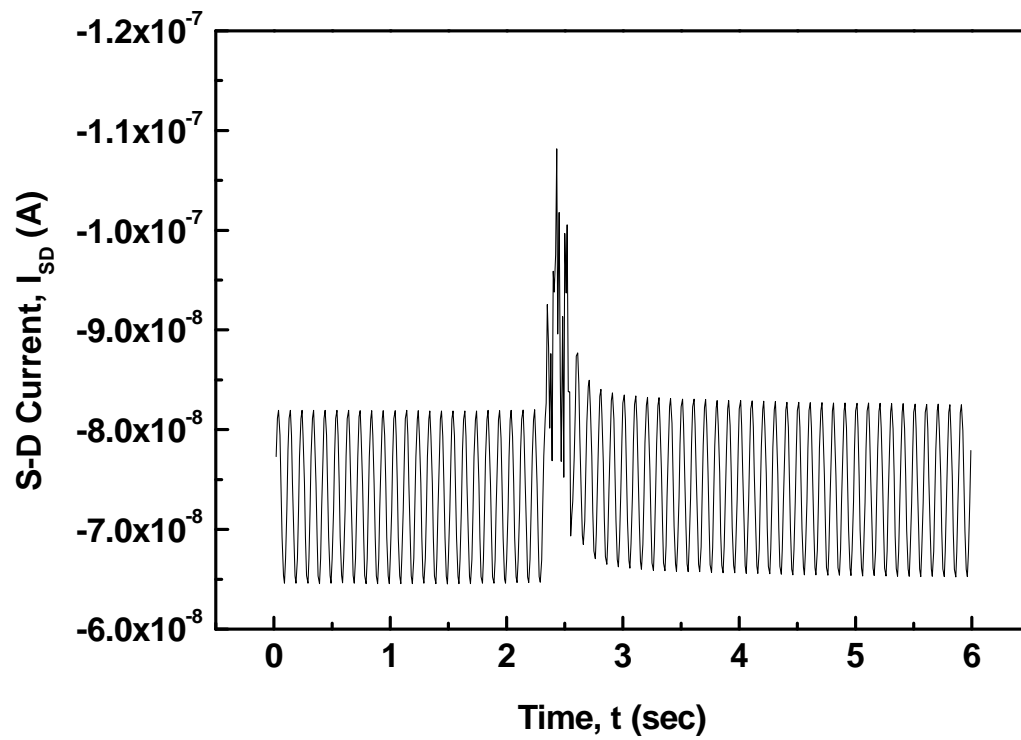

Measured  $I_D$  while being biased by AC gate voltage of -20 V at frequency of 10 Hz with applying pressure of 0.3 kPa.

***Supporting Table S1:***

|                                       | <b>M<sub>1</sub></b><br>[pS/kPa] | <b>M<sub>2</sub></b><br>[pS/K] | <b>M<sub>3</sub></b><br>[V/MPa] | <b>M<sub>4</sub></b><br>[V/K] |
|---------------------------------------|----------------------------------|--------------------------------|---------------------------------|-------------------------------|
| <b>P(VDF-TrFE)<br/>thin film</b>      | 2.9 ± 0.03                       | 345.2 ± 2.6                    | 5.02 ± 0.042                    | -2.27 ± 0.082                 |
| <b>P(VDF-TrFE)<br/>microstructure</b> | 44.2 ± 0.28                      | 342.1 ± 3.4                    | 14.07 ± 0.055                   | -2.06 ± 0.043                 |

Extracted M values of FETs using P(VDF\_TrFE) microstructure and thin film. M<sub>1</sub>, M<sub>2</sub> : Piezo-resistive and thermal-resistive coefficient of pentacene organic semiconductors respectively, M<sub>3</sub>, M<sub>4</sub> : Piezoelectric and pyroelectric coefficient of gate dielectrics respectively.

**Supporting Table S2:**

| <b>Subject order</b> | <b>Sex</b> | <b>age</b> | <b>Thumb temperature outdoors (°C)</b> | <b>Thumb temperature indoors (°C)</b> |
|----------------------|------------|------------|----------------------------------------|---------------------------------------|
| 1                    | Male       | 27         | 20.2                                   | 35.6                                  |
| 2                    | Male       | 27         | 27.0                                   | 34.3                                  |
| 3                    | Female     | 26         | 23.0                                   | 34.2                                  |
| 4                    | Male       | 24         | 13.7                                   | 33.0                                  |
| 5                    | Male       | 28         | 19.5                                   | 35.0                                  |
| 6                    | Male       | 26         | 23.7                                   | 35.6                                  |
| 7                    | Male       | 27         | 23.8                                   | 33.3                                  |
| 8                    | Male       | 25         | 18.8                                   | 35.4                                  |

Extracted temperature values of subject's thumb from IR images measured by an IR camera indoors and outdoors (indoor temperature: 24°C, outdoor temperature: 3°C). Average values of thumb's temperatures indoors and outdoors were calculated as 21.2°C and 34.6°C respectively.

**Supporting Table S3:**

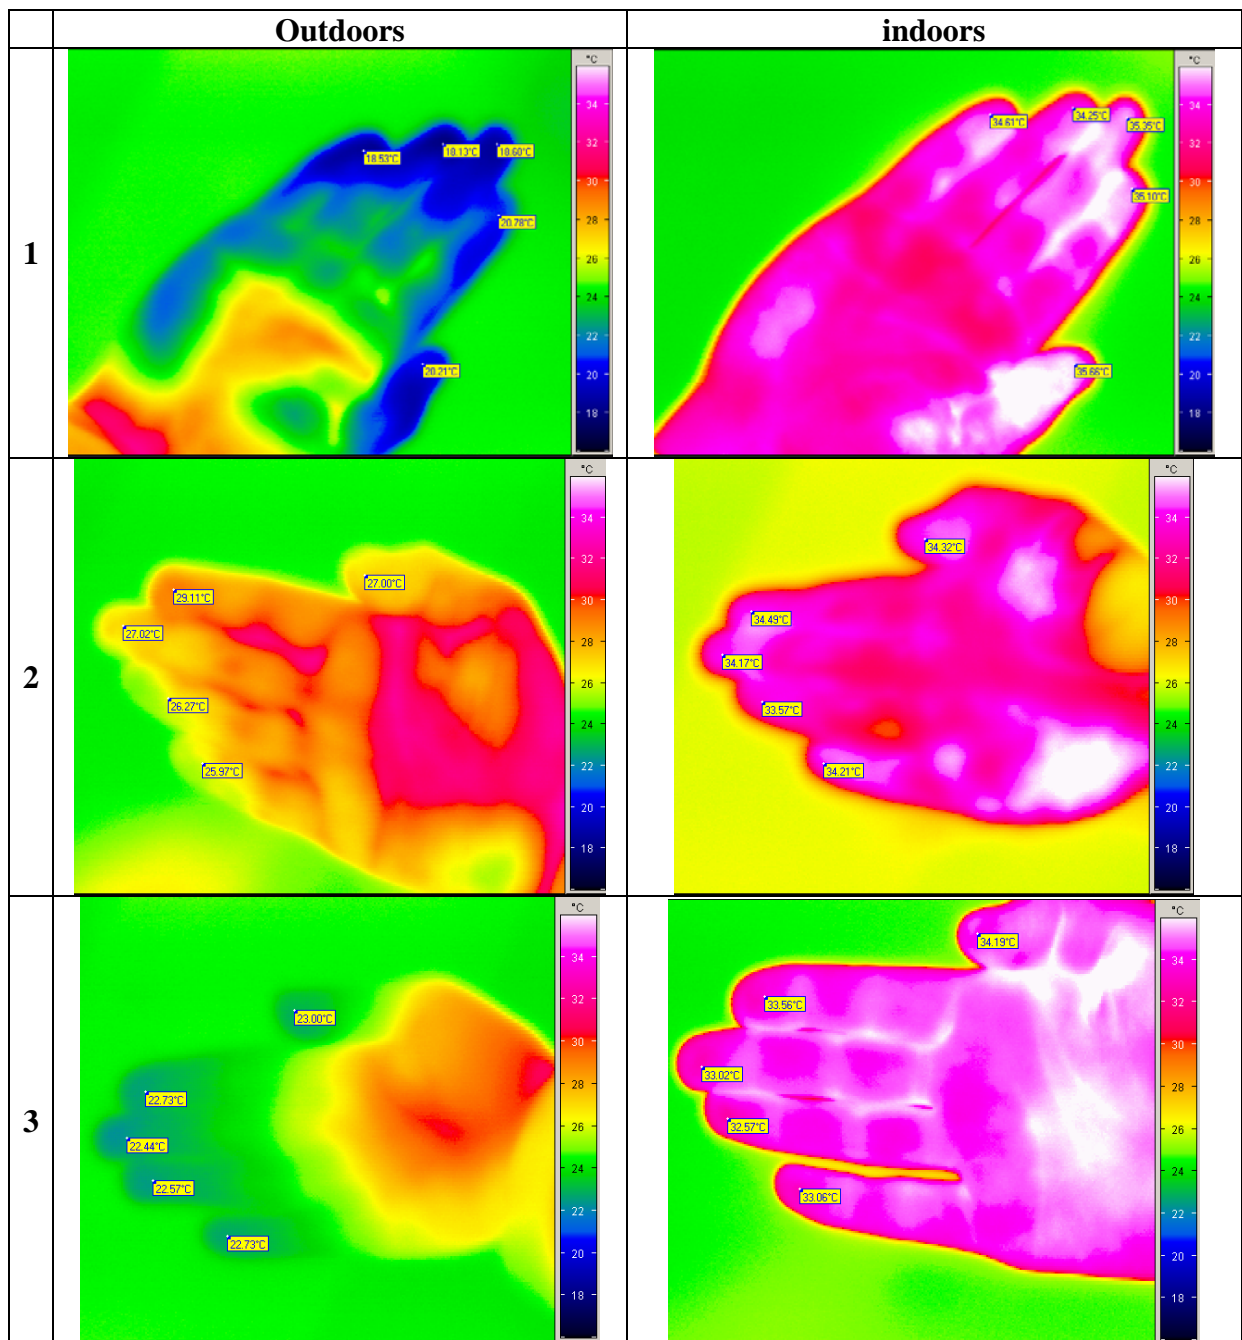



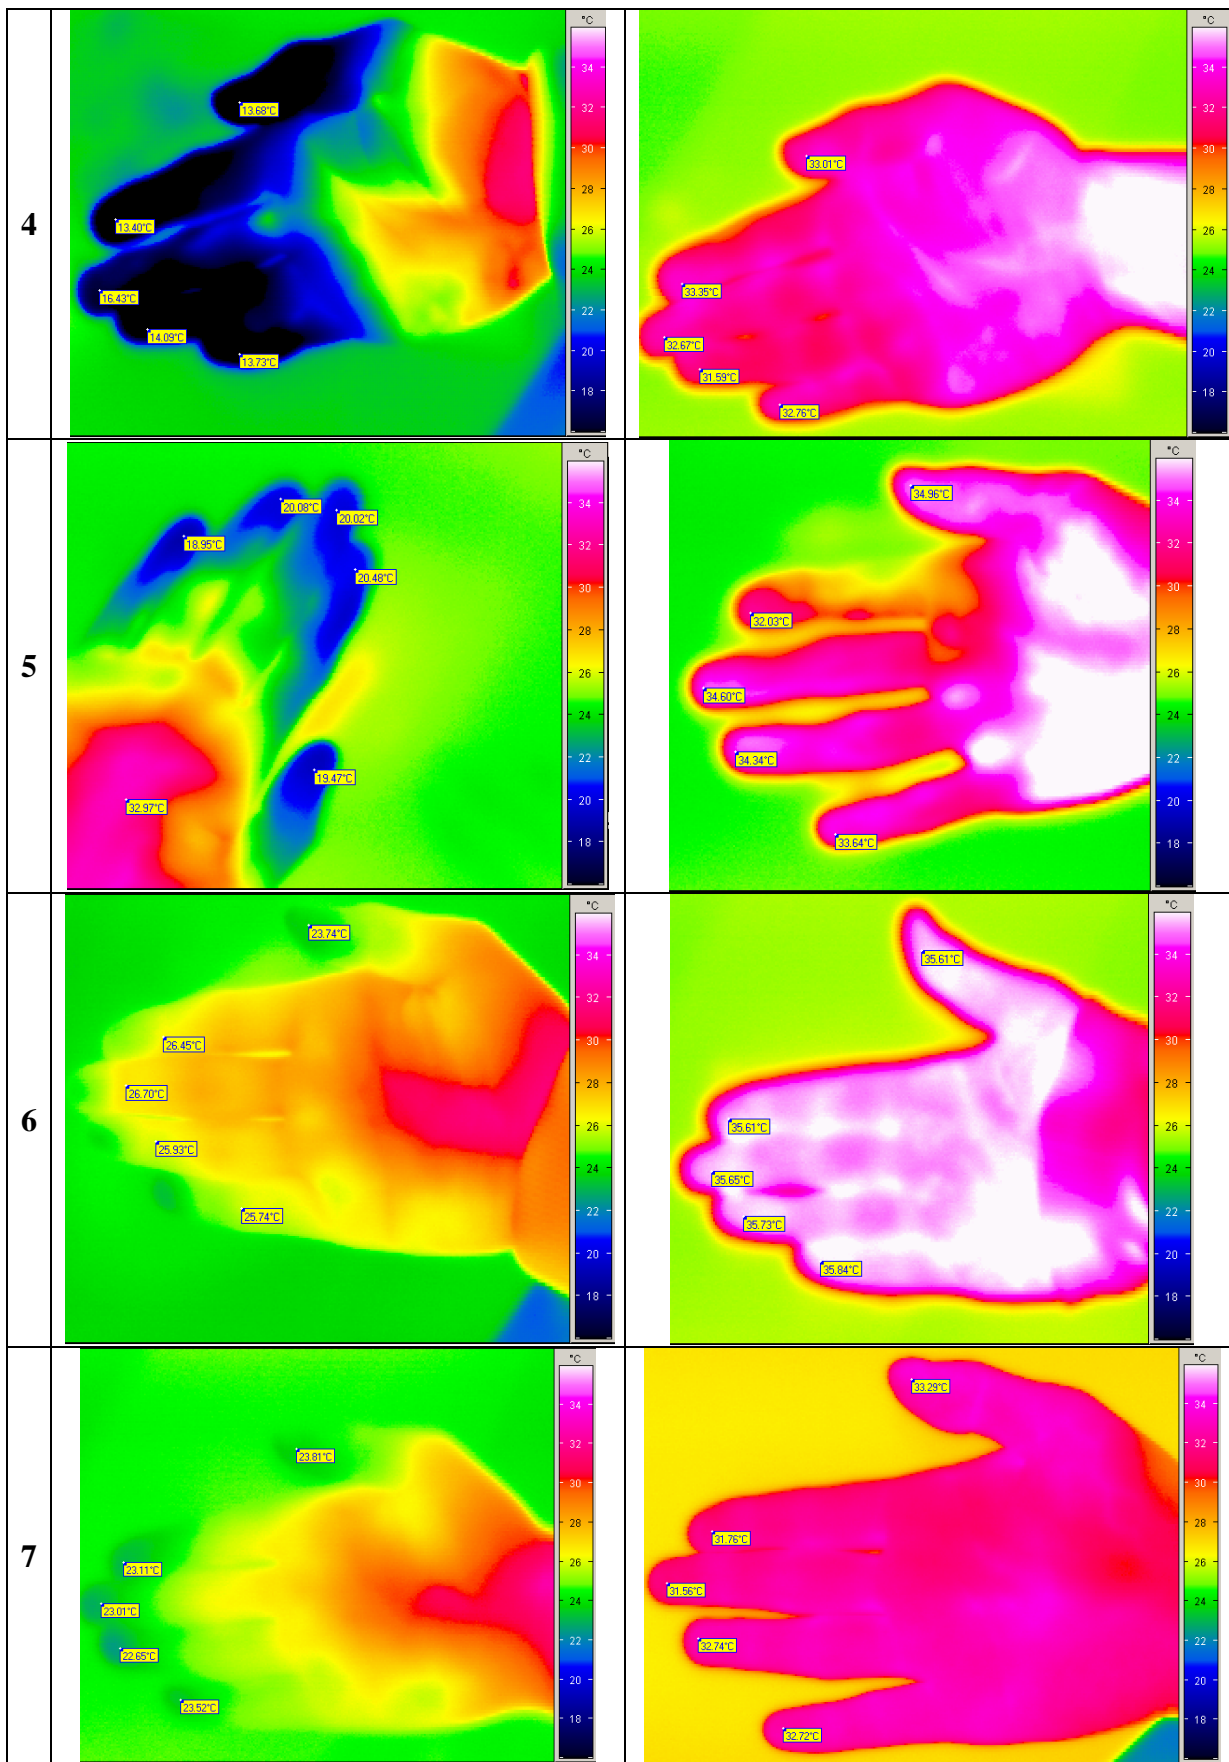

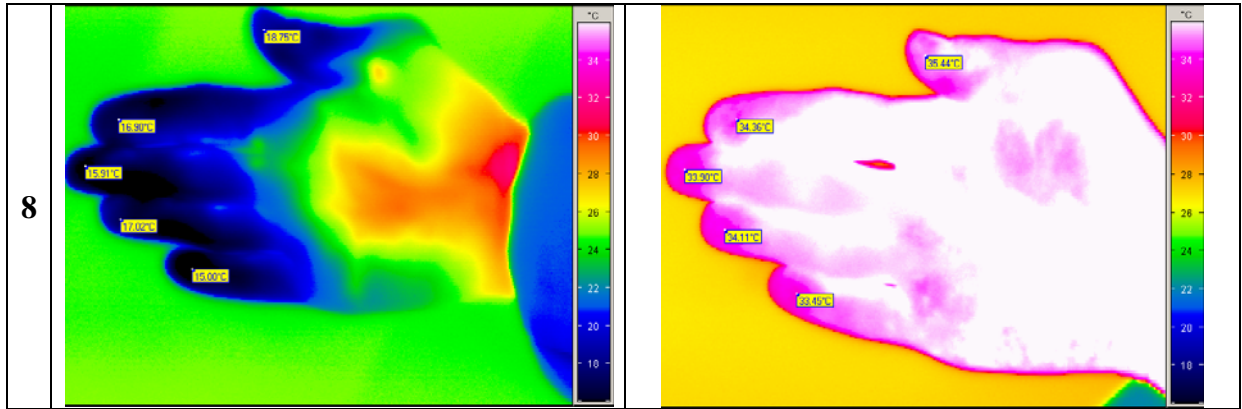

IR images of subject's palm measured by an IR camera indoors and outdoors after calibration using a thermocouple in the heated metal block.

Supporting Figure S5:

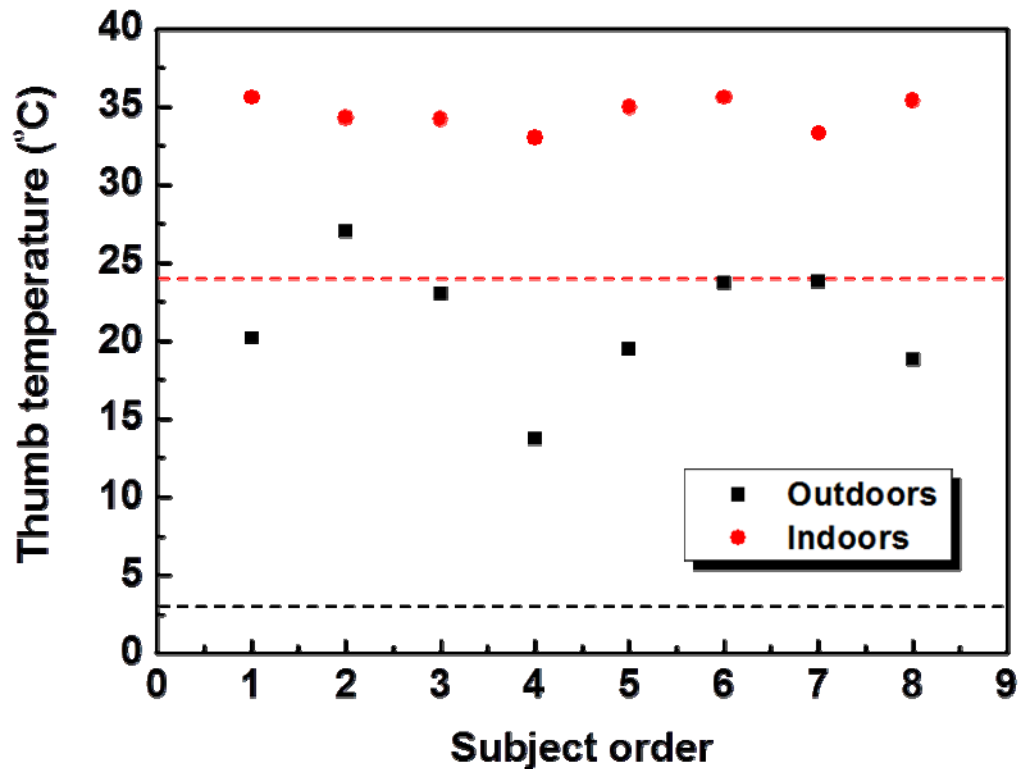

Extracted temperatures of the subject's thumbs from IR images measured by an IR camera indoors and outdoors (red and black dotted lines indicate temperatures measured indoors and outdoors, respectively).

Supporting Figure S6:

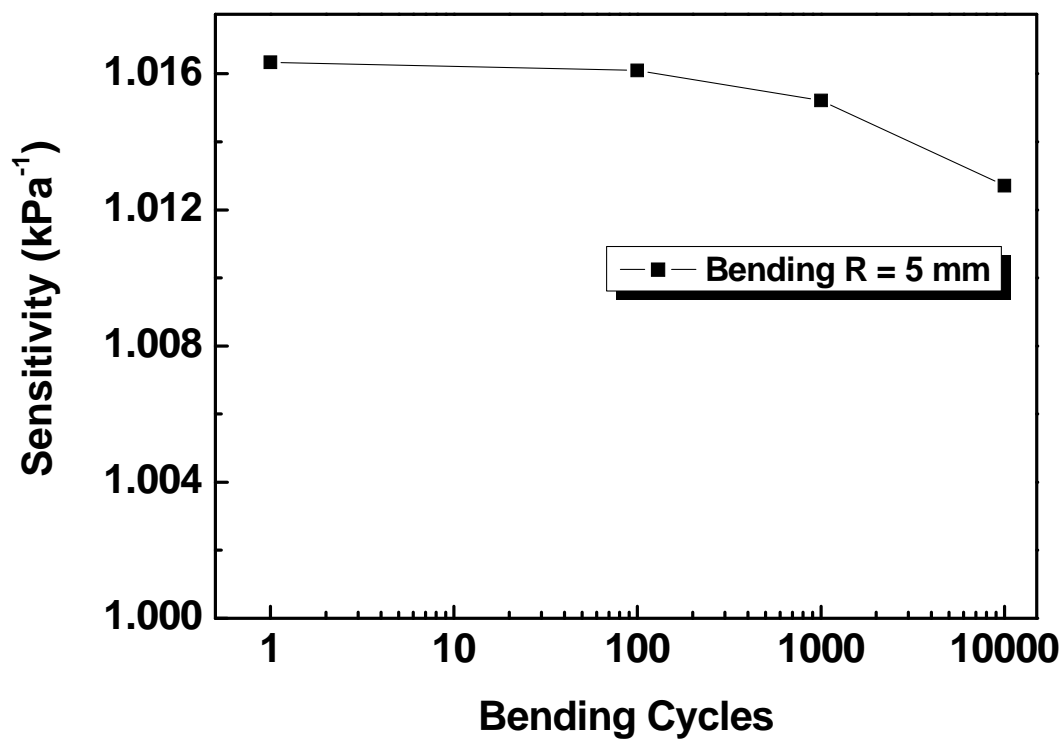

Evaluated sensitivity of microstructure OFET sensors with increasing bending cycles at the bending radius of 5 mm.

Supporting Figure S7:

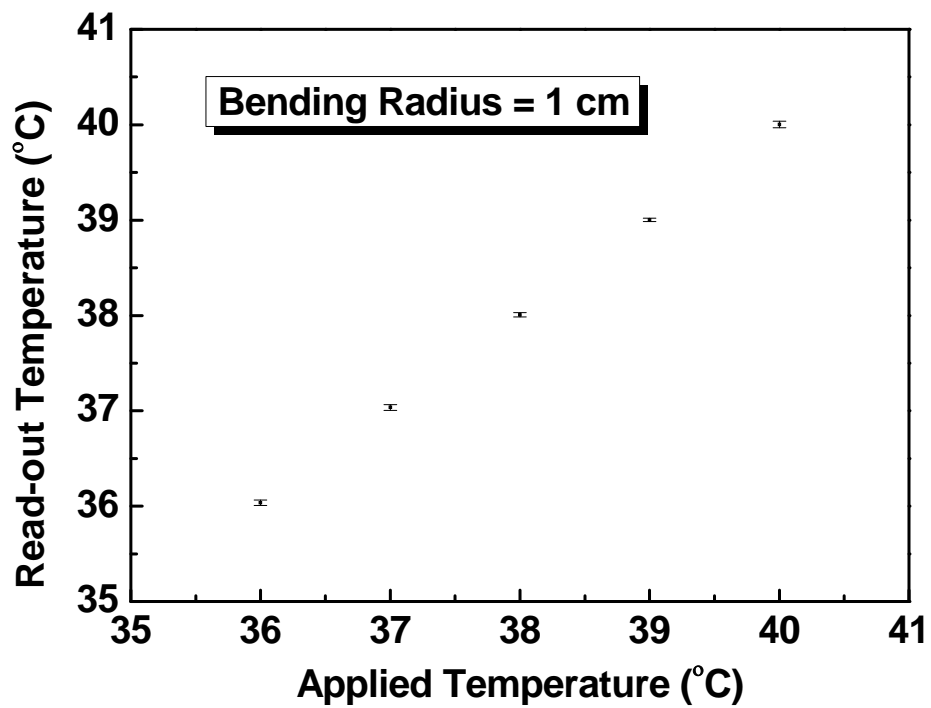

Extracted read-out temperatures under the bent state at bending radius of 1 cm. Error bars indicate the standard deviation of this temperature measurement.
